# Supplementary material for: Substitution preference of chromium ions in the clinker phase of ordinary Portland cement
Source: Royal Society of Chemistry journal article supplement (doi:10.1039/d2nj04905h), 2022-11-28
Supplement: d2nj04905h1.pdf [file d2nj04905h1.pdf]

# Supplementary Materials

## **Substitution preference of chromium ions in ordinary Portland cement clinker phases**

5 *Jianping Zhu, Qixiang Wu, Xuemao Guan, Ruiqi Zhao\**

School of Materials Science and Engineering, Henan Polytechnic University, Henan 454003, China

\*Corresponding author. Email: zhaoruiqi@hpu.edu.cn.

### 10 **Contents**

**1. XRD patterns of raw materials.**

**2. Detailed calculations, the potential contents of minerals in OPC clinker and masses of raw materials.**

**3. Minerals, supercells, parameters and K-point meshes of Cr-doped configurations.**

15 **4. Ions, coordination numbers and ionic radius.**

## 1. XRD patterns of raw materials.

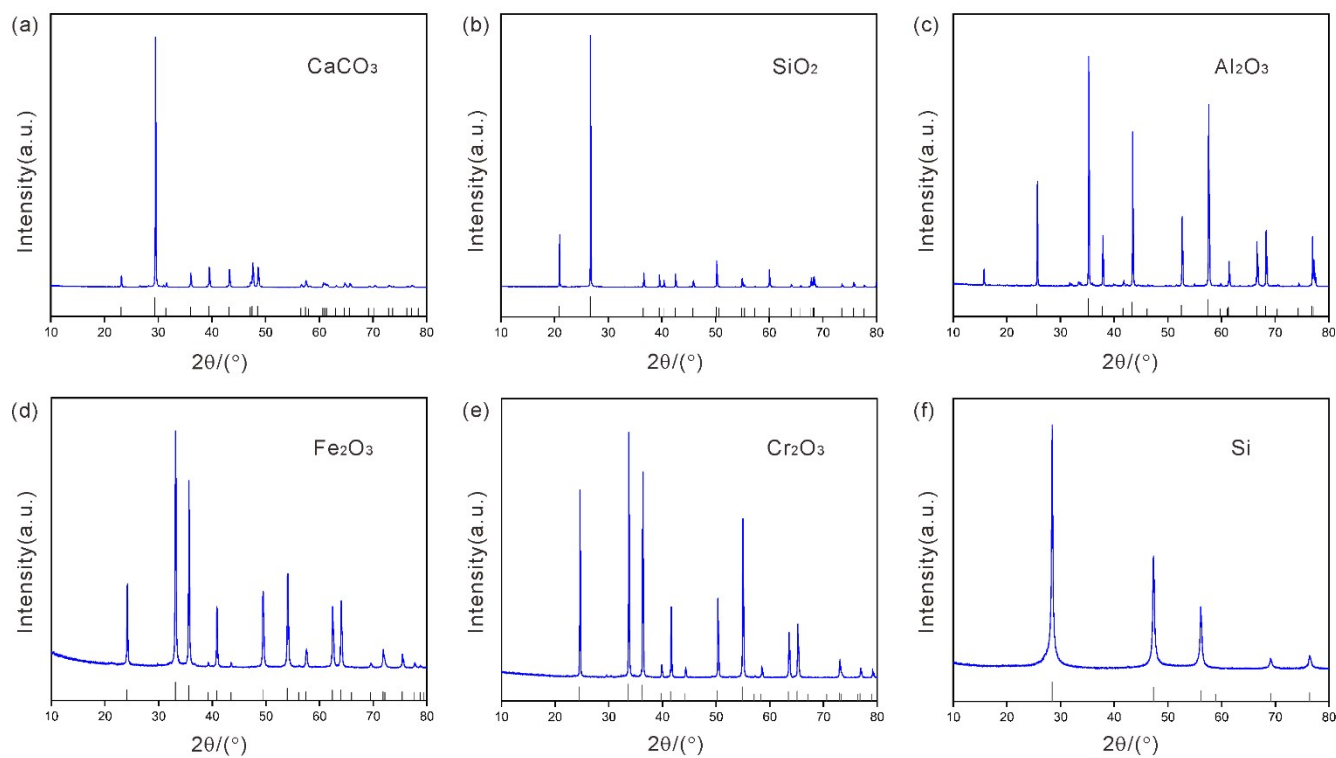

**Fig. S1** XRD patterns of raw materials: (a)  $\text{CaCO}_3$  (Space group, R-3), (b)  $\text{Al}_2\text{O}_3$  (Space group, R-3c), (c)  $\text{SiO}_2$  (Space group, P3<sub>2</sub>21), (d)  $\text{Fe}_2\text{O}_3$  (Space group, R-3c), (e)  $\text{Cr}_2\text{O}_3$  (Space group, R-3c), (f)  $\text{Si}$  (Space group, Fd-3m). The standard cards are also shown in each panel for comparison.

## 2. Detailed calculations, the potential contents of minerals in OPC clinker and masses of raw materials.

Bogue equations<sup>[1]</sup> were used to estimate the contents of OPC clinker minerals and quality of raw materials:

$$5 \quad C_3S = 4.07C - 7.6S - 6.72A - 1.43F - 2.86 \bar{S} \quad (1)$$

$$C_2S = 2.87S - 0.754C_3S \quad (2)$$

$$C_3A = 2.65A - 1.69 F \quad (3)$$

$$C_4AF = 3.04 F \quad (4)$$

Where C = CaO, S = SiO<sub>2</sub>, A = Al<sub>2</sub>O<sub>3</sub>, F = Fe<sub>2</sub>O<sub>3</sub>,  $\bar{S}$  = SO<sub>3</sub>

10 *KH* = 0.899, *SM* = 2.07 and *IM* = 1.172 of Portland cement clinker were estimated by the following formula.

$$KH = \frac{C_3S + 0.8838C_2S}{C_3S + 1.3256C_2S}$$

(5)

$$SM = \frac{C_3S + 1.3256C_2S}{1.4341C_3A + 2.0464C_4AF}$$

15 (6)

$$IM = \frac{1.1501C_3A}{C_4AF} + 0.6383 \quad (7)$$

**Table S1** The content of minerals in OPC clinker samples.

| Minerals      | C <sub>3</sub> S | C <sub>2</sub> S | C <sub>3</sub> A | C <sub>4</sub> AF |
|---------------|------------------|------------------|------------------|-------------------|
| Content (wt%) | 59               | 19               | 7                | 19                |

20 **Table S2** The percentage of raw materials used to prepare OPC clinker samples.

| Samples        | CaCO <sub>3</sub> (%) | Al <sub>2</sub> O <sub>3</sub> (%) | SiO <sub>2</sub> (%) | Fe <sub>2</sub> O <sub>3</sub> (%) | Cr <sub>2</sub> O <sub>3</sub> * (%) |
|----------------|-----------------------|------------------------------------|----------------------|------------------------------------|--------------------------------------|
| S <sub>0</sub> | 78.47                 | 3.79                               | 14.51                | 3.23                               | 0                                    |
| S <sub>1</sub> | 78.47                 | 3.79                               | 14.51                | 3.23                               | 12.5                                 |
| S <sub>2</sub> | 78.47                 | 3.79                               | 14.51                | 3.23                               | 25.0                                 |
| S <sub>3</sub> | 78.47                 | 3.79                               | 14.51                | 3.23                               | 37.5                                 |
| S <sub>4</sub> | 78.47                 | 3.79                               | 14.51                | 3.23                               | 50.0                                 |

\*Note: The quality of  $\text{Cr}_2\text{O}_3$  is calculated according to that of Fe by supposing 0, 12.5, 25.0, 37.5 and 50 mol% was substituted.

### 3. Minerals, supercells, parameters and K-point meshes of Cr-doped configurations.

**Table S3** Minerals, supercells, parameters and k-point meshes of Cr-doped configurations.

| Minerals           | Supercells | Parameter (Å)                     | K-points  |           |
|--------------------|------------|-----------------------------------|-----------|-----------|
|                    |            |                                   | Relax     | PDOS      |
| C <sub>3</sub> S*  | 1 × 1 × 1  | a = 12.24, b = 7.07, c = 9.30     | 2 × 2 × 2 | 4 × 4 × 4 |
| C <sub>2</sub> S*  | 2 × 2 × 1  | a = 11.010, b = 13.510, c = 9.311 | 2 × 2 × 3 | 5 × 4 × 5 |
| C <sub>3</sub> A*  | 1 × 1 × 1  | a = 5.57, b=14.52, c=5.35         | 2 × 2 × 2 | 3 × 3 × 3 |
| C <sub>4</sub> AF* | 2 × 1 × 2  | a = 11.168, b=14.600, c = 10.748  | 2 × 2 × 2 | 5 × 3 × 5 |

\*Notes: C<sub>3</sub>S [2-4], C<sub>2</sub>S [5], C<sub>3</sub>A [6], C<sub>4</sub>AF [7].

### 4. Ions, coordination numbers and ionic radius.

5 **Table S4** Ion types, coordination numbers and radius of Cr and atoms been substituted [8].

| Ion types        | Coordination numbers | Radius/pm |
|------------------|----------------------|-----------|
| Mn <sup>4+</sup> | 6                    | 53        |
| Mn <sup>2+</sup> | 6                    | 67        |
| Ca <sup>2+</sup> | 6                    | 100       |
| Al <sup>3+</sup> | 4                    | 39        |
| S <sup>6+</sup>  | 4                    | 12        |
| Si <sup>4+</sup> | 4                    | 26        |
| Fe <sup>3+</sup> | 6                    | 55        |

### References

1. R. I. Iacobescu, Y. Pontikes, D. Koumpouri and G. N. Angelopoulos, *Cement and Concrete Composites*, 2013, **44**, 1-8.
- 10 2. W.G. Mumme. *Neues. Jahrb. Mineral. Mon.*, 1995, 145–160.
3. F. Dunstetter, M. N. de Noirfontaine and M. Courtial, *Cement Concrete Res*, 2006, **36**, 39-53.
4. Á. G. De la Torre, R. N. De Vera, A. J. M. CuberoXs and M. A. G. Aranda, *Cement Concrete Res*, 2008, **38**, 1261-1269.
5. Y. Chen, P. Shih, L. Chiang, Y. Chang, H. Lu and J. Chang, *J Hazard Mater*, 2009, **170**, 443-448.
6. P. Mondal, J.W. Jeffery, *Acta Cryst.* 1975, **31**,689–697.
- 15 7. A.A. Colville, S. Geller, *Acta Cryst.* 1971, **27**, 2311-2315.
8. R.D. Shannon, *Acta Cryst.* 1976. **32**, 751–767.
